# Supplementary material for: Efficient and durable S-doped Ni/FeOOH electrocatalysts for oxygen evolution reactions
Source: Royal Society of Chemistry journal article supplement (doi:10.1039/d2dt03530h), 2022-12-21
Supplement: d2dt03530h1.pdf [file d2dt03530h1.pdf]

## **Supporting Information:**

### **Efficient and durable S-doped Ni/FeOOH electrocatalyst for oxygen evolution reaction**

Hongli Wang<sup>a,c</sup>, Zhifeng Zhao<sup>c</sup>, Zhikun Xu<sup>a,b,\*</sup>, Lin Li<sup>a,\*</sup>, Shuangyan Lin<sup>a,c,\*</sup>

<sup>a</sup> *Key Laboratory for Photonic and Electronic Bandgap Materials, Ministry of Education, School of Physics and Electronic Engineering, Harbin Normal University, Harbin 150025, PR China*

<sup>b</sup> *School of Science, Guangdong University of Petrochemical Technology, Maoming, Guangdong 525000, PR China*

<sup>c</sup> *School of Chemistry, Guangdong University of Petrochemical Technology, Maoming, Guangdong 525000, PR China*

\*Corresponding author.

E-mail address: [xuzhikunnano@163.com](mailto:xuzhikunnano@163.com) (Xu Z.); [linshyan123@163.com](mailto:linshyan123@163.com) (Lin S.)

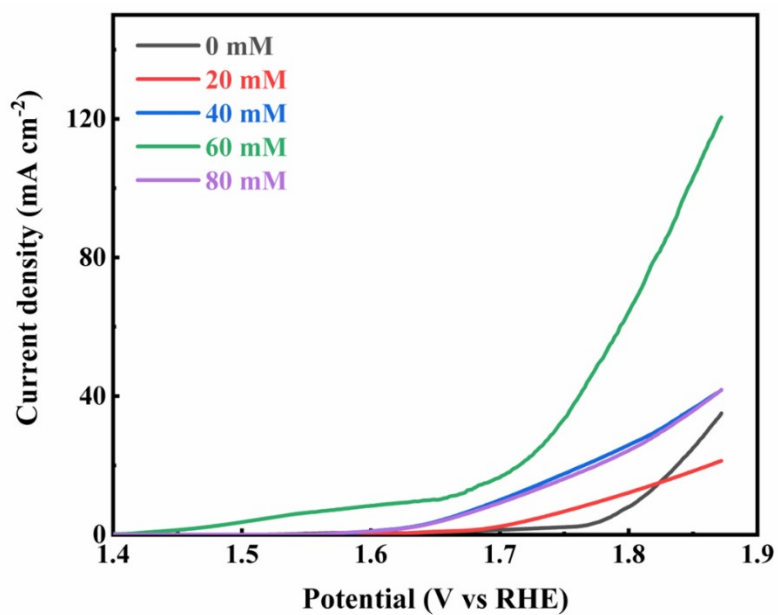

**Fig. S1** LSV curves of Ni/FeOOH@NFF prepared by using different  $\text{Fe}(\text{NO}_3)_3$  concentrations.

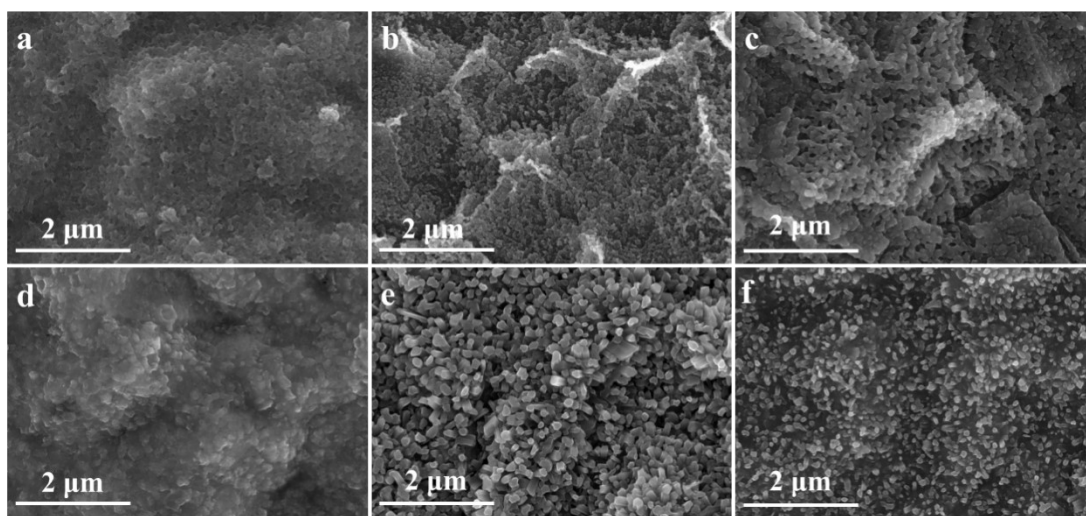

**Fig. S2** SEM images of S-Ni/FeOOH@NFF prepared by using different amounts  $\text{Na}_2\text{S}_2\text{O}_3$ : (a) 0 mg, (b) 5 mg, (c) 10 mg, (d) 20 mg, (e) 30 mg, (f) 40 mg.

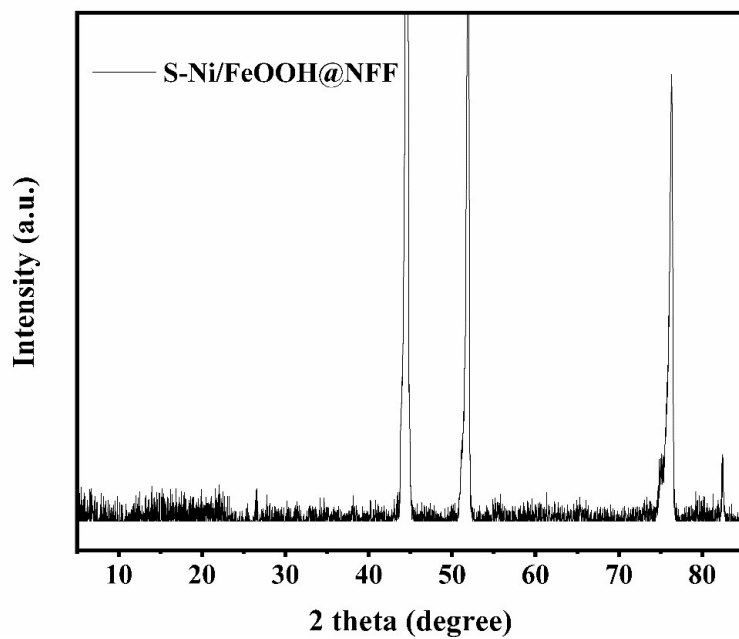

Fig. S3 XRD patterns of S-Ni/FeOOH@NFF.

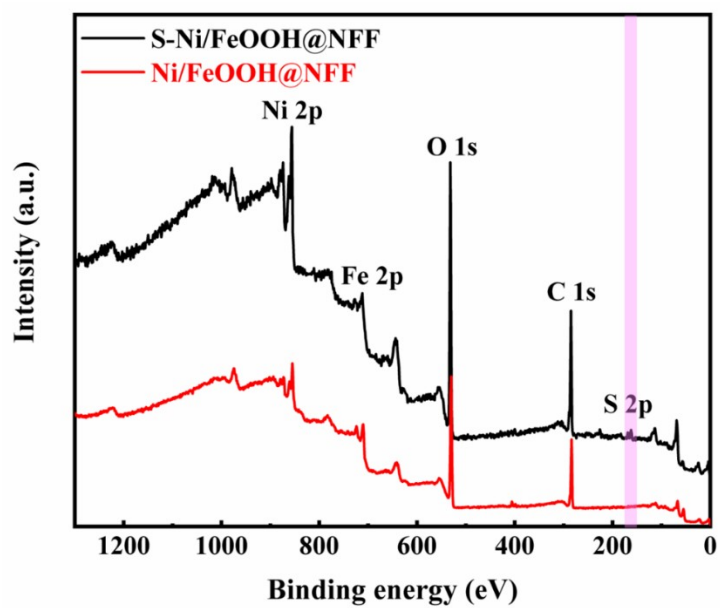

Fig. S4 Full XPS survey spectrum of S-Ni/FeOOH@NFF and Ni/FeOOH@NFF.

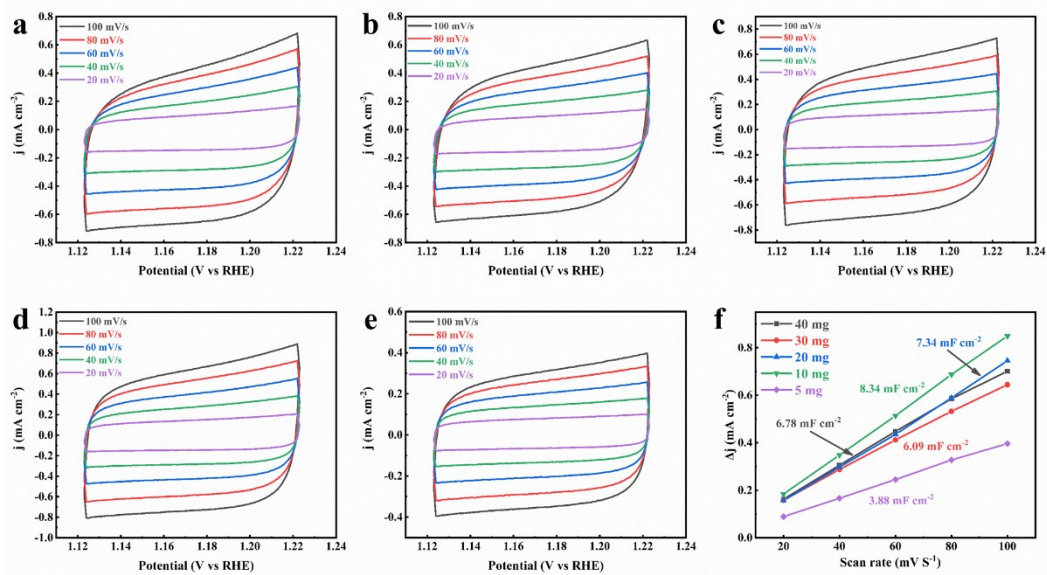

**Fig. S5** CV curves in the non-Faraday interval of S-Ni/FeOOH@NFF prepared by using different amounts  $\text{Na}_2\text{S}_2\text{O}_3$ : (a) 40 mg. (b) 30 mg. (c) 20 mg. (d) 10 mg. (e) 5 mg. (f) Plots used for evaluating the ECSA as a function of scan rate.

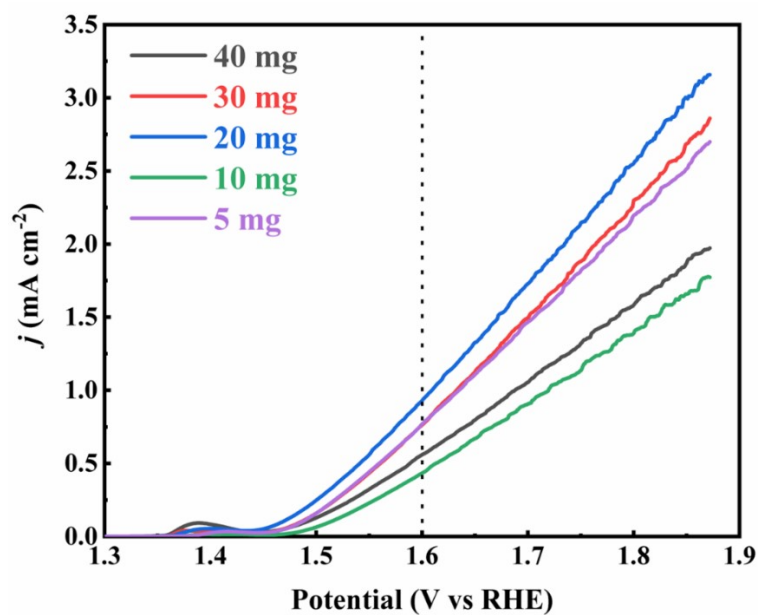

**Fig. S6** ECSA-normalized LSV curves of S-Ni/FeOOH@NFF prepared by using different amounts  $\text{Na}_2\text{S}_2\text{O}_3$ .

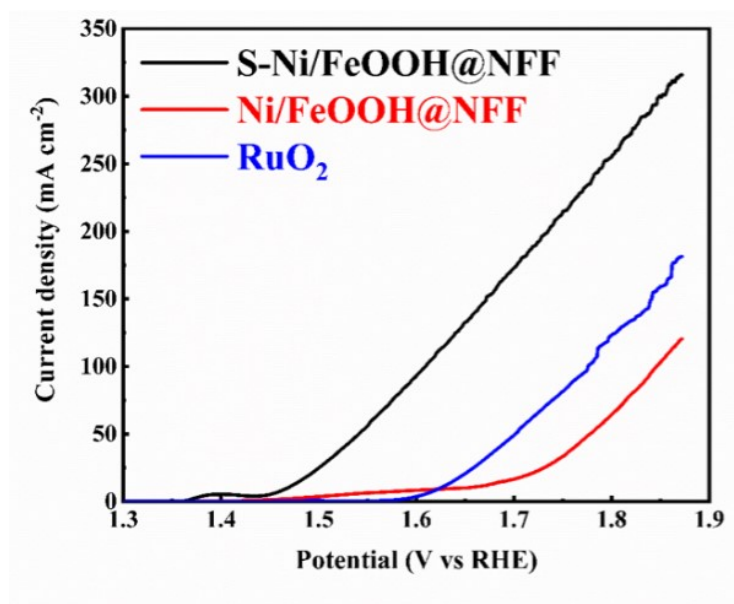

Fig. S7 LSV curves without *iR*-compensation of S-Ni/FeOOH@NFF, Ni/FeOOH@NFF and RuO<sub>2</sub>.

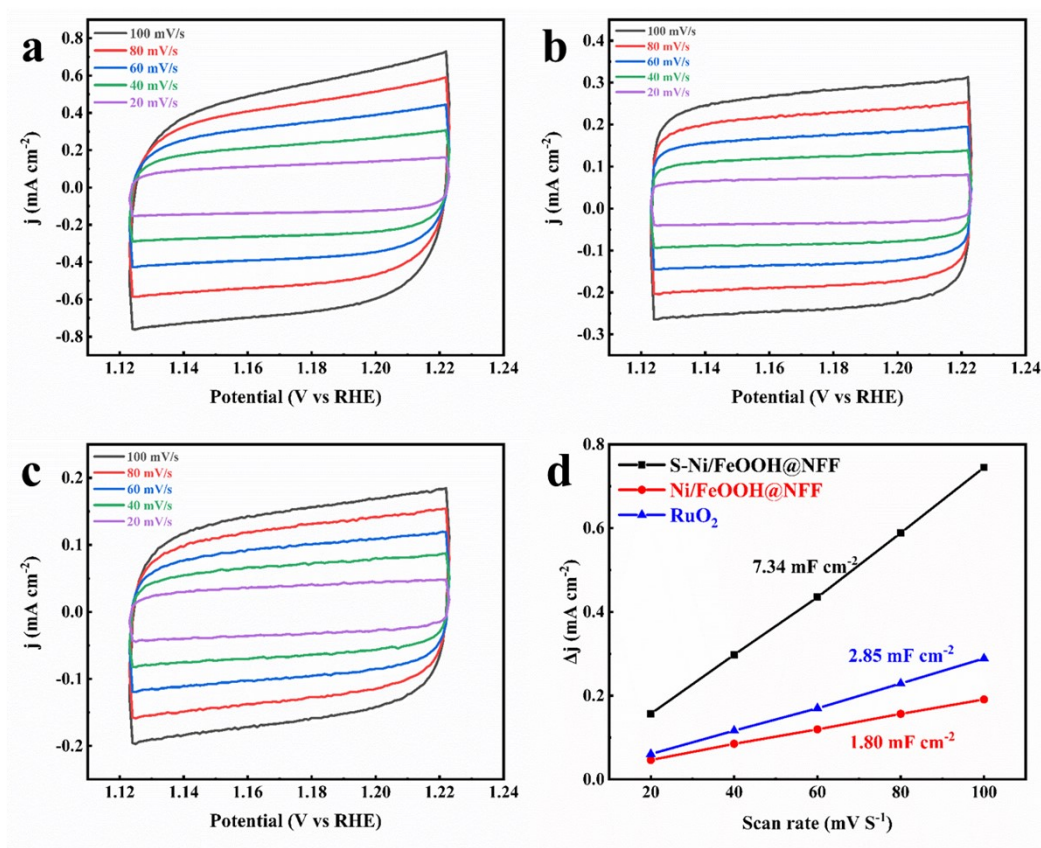

Fig. S8 CV curves in the non-Faraday interval: (a) S-Ni/FeOOH@NFF, (b) RuO<sub>2</sub>, (c) Ni/FeOOH@NFF. (d) Plots used for evaluating the ECSA as a function of scan rate.

**Table S1.** The activity comparisons of S-Ni/FeOOH with other related catalysts at 10 mA cm<sup>-2</sup>.

| Electrocatalyst                                                    | Substrate               | Overpotential (mV)<br>at 10 mA cm <sup>-2</sup> | References       |
|--------------------------------------------------------------------|-------------------------|-------------------------------------------------|------------------|
| <b>S-Ni/FeOOH</b>                                                  | <b>Nickel-iron foam</b> | <b>229</b>                                      | <b>this work</b> |
| NFF-MOF                                                            | Nickel-iron foam        | 250                                             | 1                |
| NiCo <sub>1</sub> Fe <sub>1</sub> LDH                              | Ni foam                 | 231                                             | 2                |
| Ni <sub>3</sub> S <sub>2</sub> -NiO <sub>x</sub>                   | Ni foam                 | 241                                             | 3                |
| MnCoP                                                              | Ni foam                 | 266                                             | 4                |
| Co <sub>1-x</sub> S/Co(OH)F                                        | Carbon cloth            | 269                                             | 5                |
| H-CoS <sub>x</sub> @NiFe LDH                                       | Ni foam                 | 250                                             | 6                |
| CeO <sub>x</sub> /CoP                                              | Ni foam                 | 264                                             | 7                |
| (Fe <sub>0.5</sub> Ni <sub>0.5</sub> )S <sub>2</sub>               | Carbon fiber<br>paper   | 241                                             | 8                |
| FeS/FeO <sub>x</sub> H@Fe                                          | Ni foam                 | 245                                             | 9                |
| Cu <sub>1</sub> Co <sub>10</sub> P                                 | Glassy carbon           | 252                                             | 10               |
| NiCoON                                                             | Ni foam                 | 247                                             | 11               |
| FeS <sub>2</sub> /CoNiSe <sub>2</sub>                              | Ni foam                 | 230                                             | 12               |
| ECT-<br>Co <sub>0.37</sub> Ni <sub>0.26</sub> Fe <sub>0.37</sub> O | Carbon fiber            | 232                                             | 13               |
| Co <sub>5</sub> Fe <sub>3</sub> Cr <sub>2</sub>                    | Ni foam                 | 232                                             | 14               |
| Fe,Ni-CoS <sub>2</sub>                                             | Glassy carbon           | 242                                             | 15               |

**Supplementary References:**

- [1] W. Chen, X. Zhu, Y. Zhang, Y. Zhou, K.K. Ostrikov, Bimetal–organic frameworks from In Situ-activated NiFe foam for highly efficient water splitting, *Acs. Sustain. Chem. eng.*, 2021, **9**(4), 1826-1836.
- [2] X. Wang, Y. He, Y. Zhou, R. Li, W. Lu, K. Wang, W. Liu, In situ growth of NiCoFe-layered double hydroxide through etching Ni foam matrix for highly enhanced oxygen evolution reaction, *Int. j. hydrogen. Energy.*, 2022, **47**(56), 23644-23652.
- [3] Z. Huang, L. He, W. Zhang, W. Huang, Q. Mo, L. Yang, Q. Fu, Q. Gao, Nickel sulfide-oxide heterostructured electrocatalysts: Bi-functionality for overall water splitting and in-situ reconstruction, *J. colloid. Interf. Sci.*, 2022, **622** 728-737.
- [4] W.-Y. Fu, Y.-X. Lin, M.-S. Wang, S. Si, L. Wei, X.-S. Zhao, Y.-S. Wei, Sepaktakraw-like catalyst Mn-doped CoP enabling ultrastable electrocatalytic oxygen evolution at 100 mA·cm<sup>-2</sup> in alkali media, *Rare. Metals.*, 2022, 1-9.

- [5] Q. Lin, D. Guo, L. Zhou, L. Yang, H. Jin, J. Li, G. Fang, X.a. Chen, S. Wang, Tuning the Interface of  $\text{Co}_{1-x}\text{S}/\text{Co}(\text{OH})\text{F}$  by Atomic Replacement Strategy toward High-Performance Electrocatalytic Oxygen Evolution, *Acs. Nano.*, 2022, **16**(9) 15460-15470.
- [6] Y.J. Lee, S.K. Park, Metal-Organic Framework-Derived Hollow  $\text{CoS}_x$  Nanoarray Coupled with NiFe Layered Double Hydroxides as Efficient Bifunctional Electrocatalyst for Overall Water Splitting, *Small.*, 2022, **18**(16) 2200586.
- [7] T. Zhang, X. Wu, Y. Fan, C. Shan, B. Wang, H. Xu, Y. Tang, Hollow  $\text{CeO}_x/\text{CoP}$  Heterostructures Using Two-Dimensional Co-MOF As Template for Efficient and Stable Electrocatalytic Water Splitting, *Chemnanomat.*, 2020, **6**(7) 1119-1126.
- [8] W. Dai, Y. Pan, K. Ren, Y.-a. Zhu, T. Lu, Heteroatom Ni alloyed pyrite-phase  $\text{FeS}_2$  as a pre-catalyst for enhanced oxygen evolution reaction, *Electrochim. Acta.*, 2020, **355** 136821.
- [9] Y. Tan, X. Xu, Q. Li, X. Chen, Q. Che, Y. Chen, Y. Long, Constructing ultrathin  $\text{FeS}/\text{FeO}_x\text{H}@ \text{Fe}$  nano-sheets for highly efficient oxygen evolution reaction, *J. colloid. Interf. Sci.*, 2021, **594** 575-583.
- [10] D. Thiyagarajan, M. Gao, L. Sun, X. Dong, D. Zheng, M.A. Wahab, G. Will, J. Lin, Nanoarchitected porous Cu-CoP nanoplates as electrocatalysts for efficient oxygen evolution reaction, *Chem. Eng. J.*, 2022, **432** 134303.
- [11] Y. Li, L. Hu, W. Zheng, X. Peng, M. Liu, P.K. Chu, L.Y.S. Lee, Ni/Co-based nanosheet arrays for efficient oxygen evolution reaction, *Nano. Energy.*, 2018, **52** 360-368.
- [12] J. Yang, H. Xuan, J. Yang, L. Meng, J. Wang, X. Liang, Y. Li, P. Han, Metal-organic framework-derived  $\text{FeS}_2/\text{CoNiSe}_2$  heterostructure nanosheets for highly-efficient oxygen evolution reaction, *Appl. surf. Sci.*, 2022, **578** 152016.
- [13] W. Chen, H. Wang, Y. Li, Y. Liu, J. Sun, S. Lee, J.-S. Lee, Y. Cui, In situ electrochemical oxidation tuning of transition metal disulfides to oxides for enhanced water oxidation, *Acs. Central. Sci.*, 2015, **1**(5) 244-251.
- [14] J. Chen, H. Li, S. Chen, J. Fei, C. Liu, Z. Yu, K. Shin, Z. Liu, L. Song, G. Henkelman, Co-Fe-Cr (oxy) hydroxides as efficient oxygen evolution reaction

catalysts, *Adv. Energy. Mater.*, 2021, **11**(11) 2003412.

[15] W. Peng, A. Deshmukh, N. Chen, Z. Lv, S. Zhao, J. Li, B. Yan, X. Gao, L. Shang, Y. Gong, Deciphering the Dynamic Structure Evolution of Fe-and Ni-Codoped CoS<sub>2</sub> for Enhanced Water Oxidation, *Acs. Catal.*, 2022, **12**(7) 3743-3751.
